# Supplementary material for: Mood as Representation of Momentum
Source: PubMed Central journal article supplement (PMC4703769; doi:10.1016/j.tics.2015.07.010), 2016-01
Supplement: mmc1.pdf [file mmc1.pdf]

## Supplementary Material

### Mood as representation of momentum

Eran Eldar<sup>1,2,\*†</sup>, Robb B. Rutledge<sup>1,2,†</sup>, Raymond J. Dolan<sup>1,2</sup>, Yael Niv<sup>3</sup>

<sup>1</sup> Wellcome Trust Centre for Neuroimaging, University College London, London WC1N 3BG, UK

<sup>2</sup> Max Planck University College London Centre for Computational Psychiatry and Ageing Research, London WC1B 5EH, UK

<sup>3</sup> Princeton Neuroscience Institute and Psychology Department, Princeton University, Princeton, NJ 08544, USA

\* Correspondence: [e.eldar@ucl.ac.uk](mailto:e.eldar@ucl.ac.uk) (E. Eldar).

† These authors contributed equally to this article.

### Supplementary Material Inventory:

1. Supplementary Note S1

#### Supplementary Note S1. Derivation of optimal learning algorithms.

Here we will derive the optimal learning algorithm for the models in Box 2 by casting each model as a Kalman filter model [S1], and then using the standard solution for Kalman filters.

A Kalman filter model consists of an unobservable (hidden) state  $\mathbf{x}$  and state covariance matrix  $\mathbf{P}$ , which need to be inferred from a sequence of observations  $\mathbf{r}$ , and a set of assumptions about how observations are generated. These assumptions include the state-transition matrix  $\mathbf{F}$ , which determines how states change over time; the state-to-observation transformation matrix  $\mathbf{H}$ , which determines how observations are generated given the current state; and the state noise covariance matrix  $\mathbf{Q}$  and observation noise covariance matrix  $\mathbf{C}$ , which introduce stochasticity into state transitions and the generation of observations.

Given observation  $\mathbf{r}_t$  at time step  $t$ , an optimal learning algorithm updates the estimates of the current state and the state covariance matrix as follows:

$$\mathbf{x}_t = \mathbf{F}\mathbf{x}_{t-1} + \mathbf{K}_t(\mathbf{r}_t - \mathbf{H}\mathbf{F}\mathbf{x}_{t-1}) \quad (1)$$

$$\mathbf{P}_t = \mathbf{F}\mathbf{P}_{t-1}\mathbf{F}^T + \mathbf{Q} - \mathbf{K}_t\mathbf{H}(\mathbf{F}\mathbf{P}_{t-1}\mathbf{F}^T + \mathbf{Q}), \quad (2)$$

where

$$\mathbf{K}_t = (\mathbf{F}\mathbf{P}_{t-1}\mathbf{F}^T + \mathbf{Q})\mathbf{H}^T(\mathbf{H}(\mathbf{F}\mathbf{P}_{t-1}\mathbf{F}^T + \mathbf{Q})\mathbf{H}^T + \mathbf{C})^{-1} \quad (3)$$

#### Model I: Independent states

In this baseline model, described in Box 2 (Figure IA), each state corresponds to an independent one-dimensional Kalman filter model with the following properties:

$$\mathbf{x}_t = [v_t] \quad \mathbf{F} = [1] \quad \mathbf{H} = [1] \quad \mathbf{Q} = [q]$$

Substituting the above terms into equations (1) and (3) we get:

$$v_t = v_{t-1} + K_t(r_t - v_{t-1}) \quad (4)$$

where

$$K_t = \frac{P_{t-1} + q}{P_{t-1} + q + C} \quad (5)$$

Thus, the estimated state is updated by the difference between the observation and the previous estimate (i.e., the prediction error;  $r_t - v_{t-1}$ ) multiplied by an adaptive learning rate ( $K_t$ ) that reflects the relationship between the state and observation variance.

### Model II: States with independent and shared variance

The next model described in Box 2 (Figure IB) consists of multiple states, all of which are affected by the same general source of variance. For the case of three states, the model corresponds to a three-dimensional Kalman filter whose three dimensions represent three states with both state-specific ( $\mathbf{q}_{1:3}$ ) and shared ( $q_g$ ) variance:

$$\mathbf{x}_t = \begin{bmatrix} v_{t,1} \\ v_{t,2} \\ v_{t,3} \end{bmatrix} \quad \mathbf{F} = \begin{bmatrix} 1 & 0 & 0 \\ 0 & 1 & 0 \\ 0 & 0 & 1 \end{bmatrix} \quad \mathbf{H} = \begin{bmatrix} 1 & 0 & 0 \\ 0 & 1 & 0 \\ 0 & 0 & 1 \end{bmatrix} \quad \mathbf{Q} = \begin{bmatrix} q_g + q_1 & q_g & q_g \\ q_g & q_g + q_2 & q_g \\ q_g & q_g & q_g + q_3 \end{bmatrix}$$

Substituting the above terms into equations (1) and (3) we get:

$$\begin{bmatrix} v_{t,1} \\ v_{t,2} \\ v_{t,3} \end{bmatrix} = \begin{bmatrix} v_{t-1,1} \\ v_{t-1,2} \\ v_{t-1,3} \end{bmatrix} + \mathbf{K}_t \begin{bmatrix} r_{t,1} - v_{t-1,1} \\ r_{t,2} - v_{t-1,2} \\ r_{t,3} - v_{t-1,3} \end{bmatrix}, \quad (6)$$

where

$$\mathbf{K}_t = (\mathbf{P}_{t-1} + \mathbf{Q})(\mathbf{P}_{t-1} + \mathbf{Q} + \mathbf{C})^{-1} \quad (7)$$

Thus, the estimated states are updated by the vector of prediction errors ( $\mathbf{r}_t - \mathbf{x}_{t-1}$ ) multiplied by the matrix  $\mathbf{K}_t$ , which integrates the different types of covariance. Importantly, due to the variance that is shared between the states (i.e., the off-diagonal entries in  $\mathbf{Q}$ ), the Kalman gain matrix  $\mathbf{K}_t$  has nonzero off-diagonal values, and thus each state is updated not only by its own prediction error, but also by the prediction errors of the other states.

### Model III: A state with momentum

The final model described in Box 2 (Figure IC) corresponds to a two-dimensional Kalman filter, consisting of a state ( $v_t$ ) and its momentum ( $m_t$ ). Observations are only directly dependent on the state  $v_t$ , but  $v_t$  is updated at each time step by addition of the momentum  $m_t$  (as indicated by the triangular state-transition matrix  $\mathbf{F}$ ):

$$\mathbf{x}_t = \begin{bmatrix} m_t \\ v_t \end{bmatrix} \quad \mathbf{F} = \begin{bmatrix} 1 & 0 \\ 1 & 1 \end{bmatrix} \quad \mathbf{H} = [0 \quad 1] \quad \mathbf{Q} = \begin{bmatrix} q_m & 0 \\ 0 & q_v \end{bmatrix}$$

Substituting the above terms into equations (1) and (3) we get:

$$m_t = m_{t-1} + K_{t,1}((r_t - v_{t-1}) - m_{t-1}) \quad (8)$$

$$v_t = v_{t-1} + K_{t,2}(K_{t,3}m_{t-1} + r_t - v_{t-1}), \quad (9)$$

where  $K_{t,1} = \frac{P_{t,1,1} + P_{t,1,2}}{q_v + \sum_{i,j} P_{i,j}}$  and  $K_{t,2} = \frac{q_v + \sum_{i,j} P_{i,j}}{q_v + C + \sum_{i,j} P_{i,j}}$  are adaptive learning rates whose value is between 0 and 1, and  $K_{t,3} = \frac{1}{K_{t,2}} - 1$  is an adaptive scaling factor.

Thus, the momentum estimate consists of a running average of recent outcome prediction errors, and the state estimate update includes a bonus that is proportional to the momentum estimate.

## References

- S1. Bishop, C.M. (2006) *Pattern Recognition and Machine Learning*, Springer
